# Supplementary material for: Effects of subjective and objective autoregulation methods for intensity and volume on enhancing maximal strength during resistance-training interventions: a systematic review
Source: PeerJ journal article supplement (doi:10.7717/peerj.10663), 2021-01-12
Supplement: review_data.pdf [file review_data.pdf]

| <b>Training-method</b>                                                                 | <b>Date searched:</b> | <b>Database</b> | <b>Keywords</b>                                                                                                                                                                  | <b>Number of hits</b> | <b>Included in review</b> | <b>Search mode</b>                                           |
|----------------------------------------------------------------------------------------|-----------------------|-----------------|----------------------------------------------------------------------------------------------------------------------------------------------------------------------------------|-----------------------|---------------------------|--------------------------------------------------------------|
| Autoregulatory progressive resistance exercise                                         | 09.01.2020            | SPORTDiscus     | “Autoregulatory progressive resistance exercise”                                                                                                                                 | 4                     | 1                         | Advanced search, Boolean/phrase                              |
| Rating of perceived exertion. Rating of perceived exertion with stop. Reps in reserve. | 11.01.2020            | SPORTDiscus     | “Rating of perceived exertion” OR “reps in reserve” OR “RPE-stop” AND “1 repetition maximum”                                                                                     | 3151                  | 2                         | Advanced search, Boolean/phrase                              |
| Flexible nonlinear periodization                                                       | 14.01.2020            | SPORTDiscus     | “Flexible nonlinear periodization”                                                                                                                                               | 8                     | 1                         | Advanced search, Boolean/phrase                              |
| Velocity based resistance training                                                     | 14.01.2020            | SPORTDiscus     | “Velocity based resistance training” OR “velocity-based training” OR “velocity loss” AND “1 repetition maximum” AND “linear position transducer” OR “linear velocity transducer” | 86                    | 2                         | Advanced search, Boolean/phrase                              |
| Autoregulatory progressive resistance exercise                                         | 09.01.2020            | Google Scholar  | “Autoregulatory progressive resistance exercise” AND “autoregulation” AND “1 repetition maximum”                                                                                 | 1530                  | 0                         | Advanced search, find all words                              |
| Rating of perceived exertion. Rating of perceived exertion with stop. Reps in reserve. | 13.01.2020            | Google Scholar  | “Rating of perceived exertion” OR “reps in reserve” OR “RPE-stop” AND “1 repetition maximum” AND “autoregulation”                                                                | 473                   | 0                         | Advanced search, find all words                              |
| Flexible nonlinear periodization                                                       | 14.01.2020            | Google Scholar  | “Flexible nonlinear periodization” AND “autoregulation” AND “1 repetition maximum”                                                                                               | 90                    | 1                         | Advanced search, find all words                              |
| Velocity based resistance training                                                     | 15.01.2020            | Google Scholar  | “Velocity based resistance training” AND “autoregulation” AND “linear position transducer” OR “linear velocity transducer” AND “autoregulation”                                  | 2320                  | 3                         | Advanced search, find all words, removed: patents AND quotes |
| Autoregulatory progressive resistance exercise                                         | 10.01.2020            | PubMed          | “Autoregulatory progressive resistance exercise”                                                                                                                                 | 2                     | 0                         | Advanced search, all fields                                  |
| Rating of perceived exertion. Rating of perceived exertion with stop. Reps in reserve. | 13.01.2020            | PubMed          | “Rating of perceived exertion” OR “reps in reserve” OR “RPE-stop” AND “1 repetition maximum”                                                                                     | 110                   | 0                         | Advanced search, all fields                                  |
| Flexible nonlinear periodization                                                       | 14.01.2020            | PubMed          | “Flexible nonlinear periodization”                                                                                                                                               | 11                    | 0                         | Advanced search, all fields                                  |
| Velocity based resistance training                                                     | 17.01.2020            | PubMed          | “Velocity based training” OR “velocity-based resistance training” OR “velocity loss” AND “linear position transducer” OR “linear velocity transducer”                            | 85                    | 0                         | Advanced search, all fields                                  |
